# Supplementary material for: Osmosensing by WNK Kinases
Source: PubMed Central journal article supplement — Mol Biol Cell. 2021 Aug 19;32(18):1614–23. doi: 10.1091/mbc.E20-01-0089 (PMC8684725; doi:10.1091/mbc.e20-01-0089), 2021-08-19
Supplement: mbc-32-1614-s001.pdf [file mbc-32-1614-s001.pdf]

# Supplemental Materials

*Molecular Biology of the Cell*

Akella et al.

## SUPPORTING INFORMATION

**Supporting Information.** The following files are available free of charge.

**Figure S1.** Blots corresponding to data in Figure 1 and Coomassie stain of Pro-Q Diamond gels from Figure 2.

**Figure S2.** Structural insights

**Table S1.** Autophosphorylation sites in WNK<sub>3</sub>

**Table S2.** SAXS data collection and analysis without and with 15% PEG<sub>400</sub>

**Table S3.** CRYSOLO<sub>3</sub> analysis of SAXS data for  $\mu$ WNK<sub>3</sub> without PEG<sub>400</sub>

**Table S4.** Statistics of WNK<sub>1SA</sub> crystallographic data and refinement statistics (PDB file 6CN9)

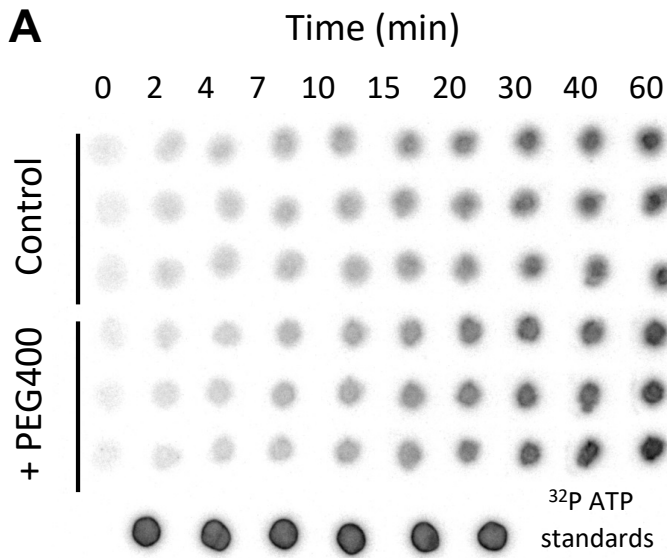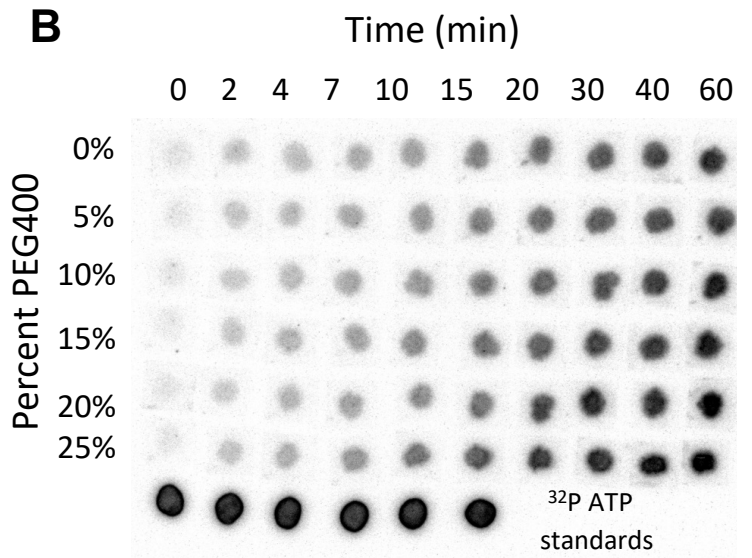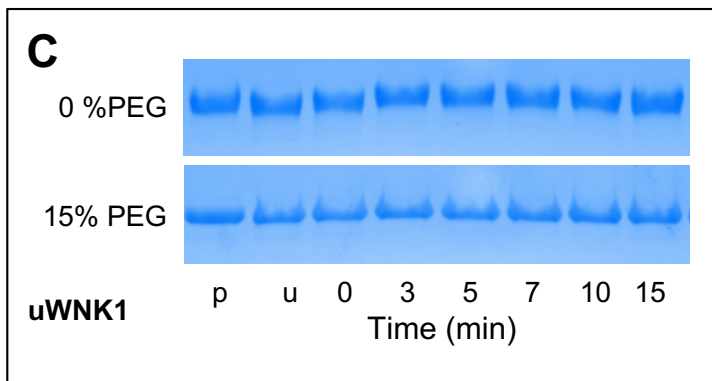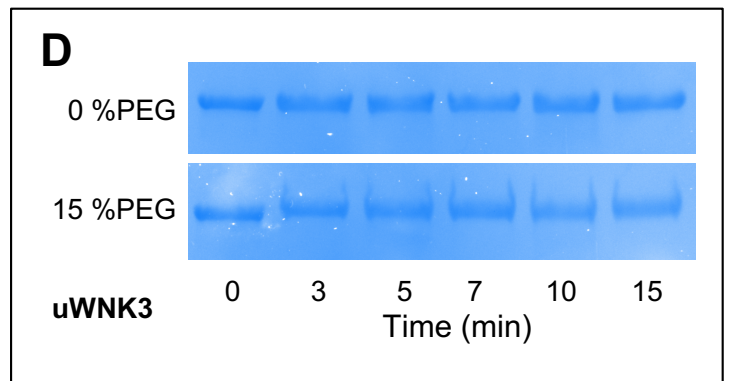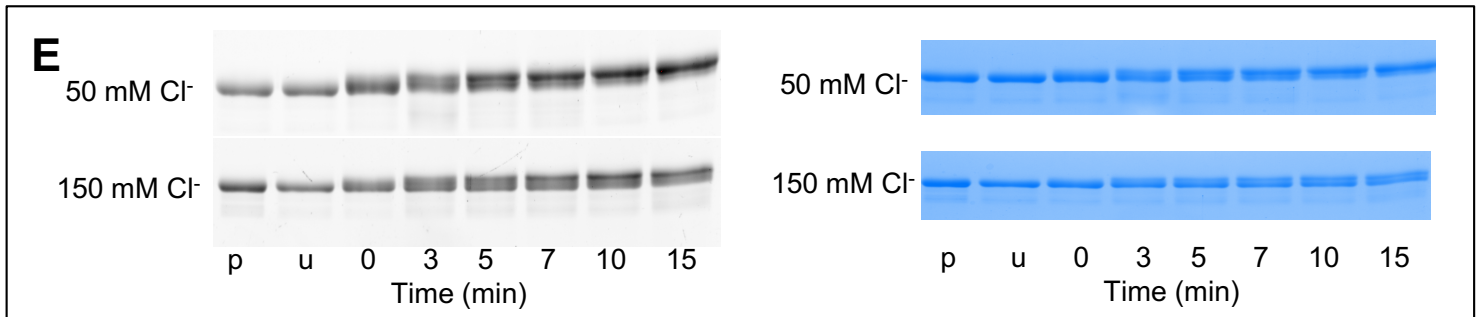

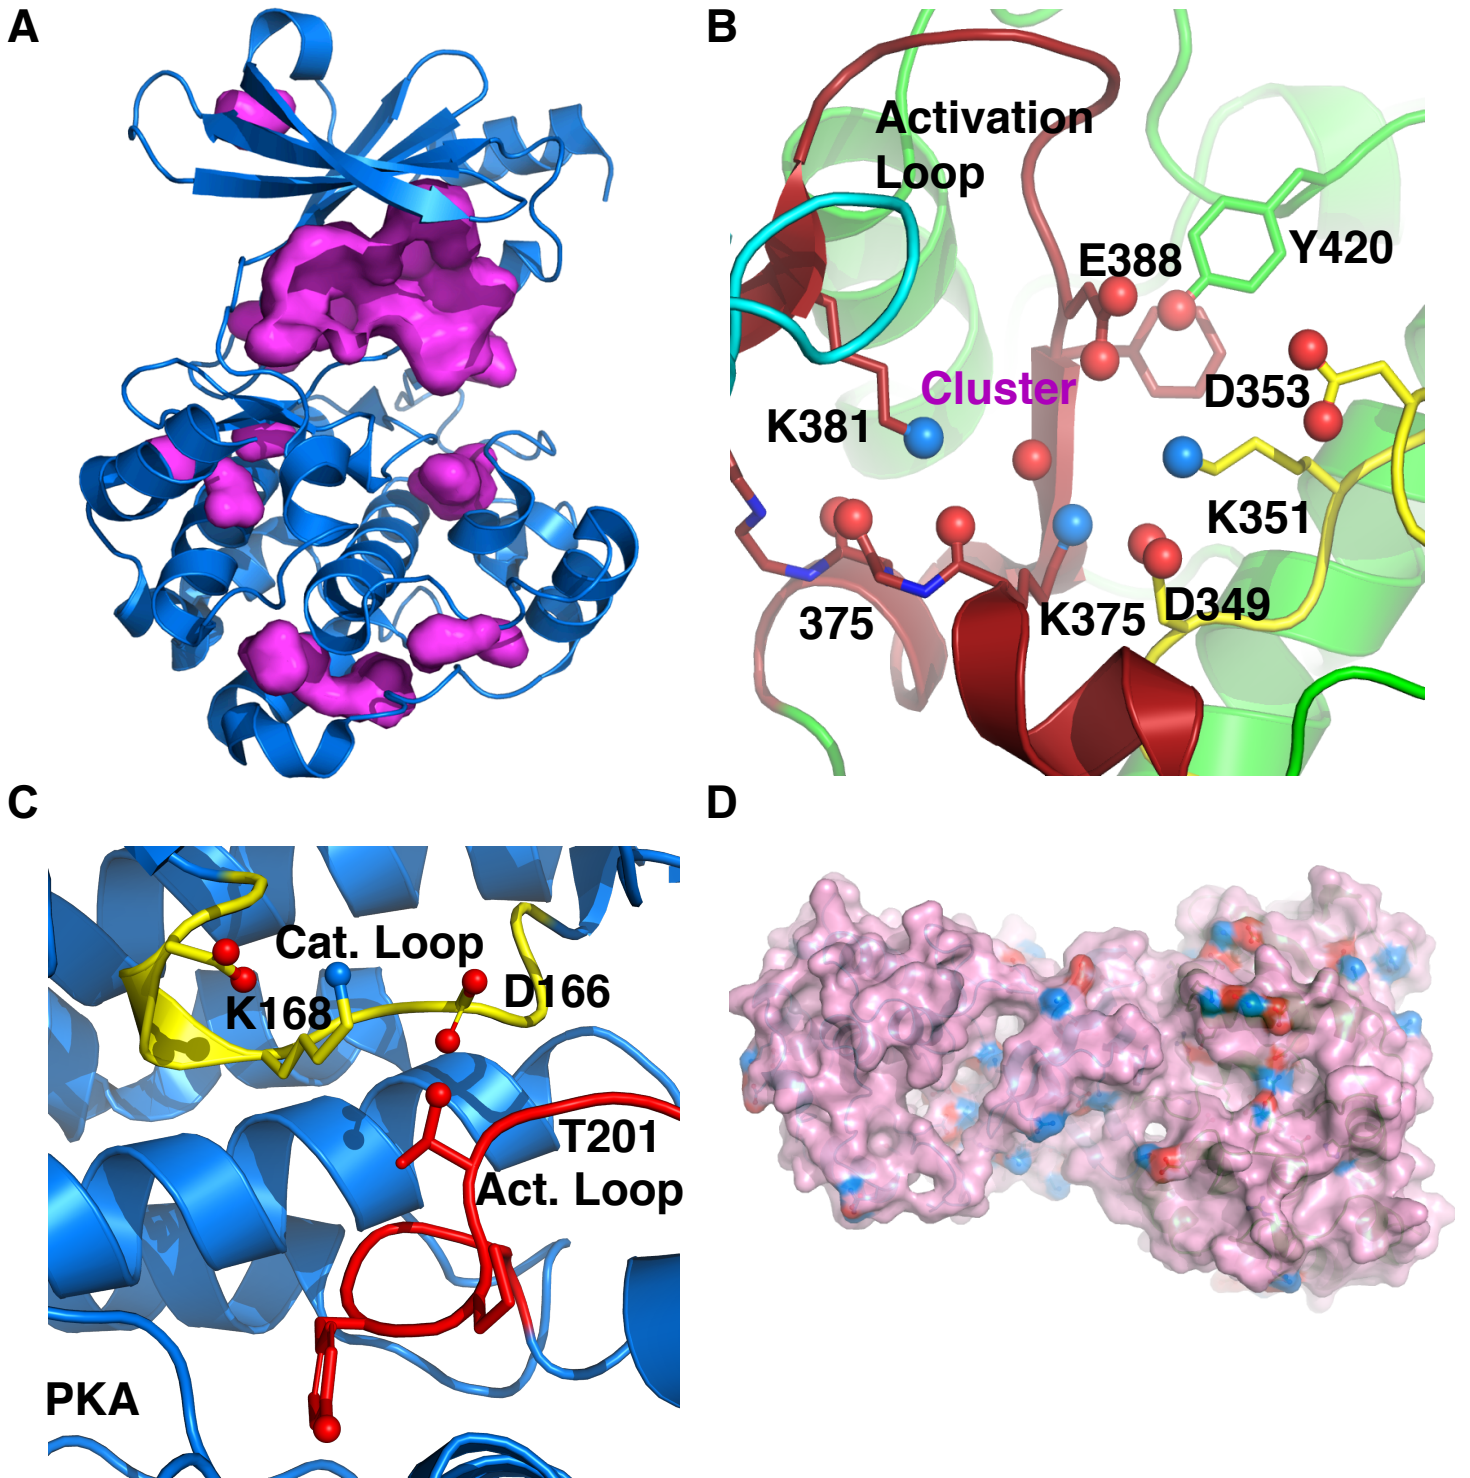

## SUPPORTING INFORMATION

Article title: Osmosensing by WNK Kinases

Radha Akella, John M. Humphreys, Kamil Sekulski, Haixia He, Mateusz Durbacz, Srinivas Chakravarthy, Joanna Liwocha, Zuhair J. Mohammed, Chad A. Brautigam, and Elizabeth J. Goldsmith

**Table S1. Autophosphorylation sites in WNK3**

| WNK3 phosphopeptide                                      | Location        | 1) From <i>E. coli</i> | 2) Dephos  | 3) Rephos  |
|----------------------------------------------------------|-----------------|------------------------|------------|------------|
| <sup>1</sup> <u>MKE</u> <b>T</b> *AAAKF <sup>9</sup>     | S-Tag           | <b>50%</b>             | <b>0%</b>  | <b>30%</b> |
| <sup>10</sup> <u>ERQHMDSPDLGTLVPRGS</u> *M <sup>28</sup> | Thrombin site   | <b>90%</b>             | <b>0%</b>  | <b>40%</b> |
| <sup>118</sup> KAVATSPS*GRFL <sup>129</sup>              | Beta sheet 1    | 20%                    | 20%        | 20%        |
| <sup>283</sup> ITGPTGS*VKIGDLGLATL <sup>300</sup>        | Beta sheet 7    | 5%                     | 5%         | 10%        |
| <sup>301</sup> MRTS*F <sup>305</sup>                     | Minor act. loop | <b>95%</b>             | <b>30%</b> | <b>50%</b> |
| <sup>306</sup> AKS*VIGTPEFMAPEMY <sup>321</sup>          | Main act. loop  | <b>95%</b>             | <b>0%</b>  | <b>80%</b> |
| <sup>359</sup> RKVTS*GIKPASF <sup>370</sup>              | Helix G         | 7%                     | 0%         | 1%         |
| <sup>404</sup> FAEDTKLPT*TENLY <sup>418</sup>            | TEV site        | 20%                    | 0%         | 2%         |

\* in red denotes phosphorylation site

AA numbering with ‘ denotes nonphysiological tag sequence (underlined)

**Table S2. SAXS data collection and analysis without and with 15% PEG400****Data Collection at Beamline BioCAT (18-ID)**

| Parameter                  | uWNK3    | uWNK3 + 15% PEG400 |
|----------------------------|----------|--------------------|
| Wavelength (Å)             | 1.0      | 1.0                |
| s-range (Å <sup>-1</sup> ) | 0.0-0.25 | 0.0-0.25           |
| Exposure time (sec)        | 0.5      | 0.5                |
| Concentration (mg/mL)      | 5        | 5                  |

**Results**

|                                |         |       |
|--------------------------------|---------|-------|
| I <sub>0</sub>                 | 0.00008 | 0.005 |
| Rg from P(r) (Å)               | 28.2    | 27.1  |
| Rg from Guinier plot (Å)       | 27.3    | 26.8  |
| Dmax (Å)                       | 95      | 108   |
| Porod Volume (Å <sup>3</sup> ) | 68000   | 67000 |
| Molecular weight (kD)          |         |       |
| From Porod volume              | 47      | 13    |
| From Vc                        | 44      | 15    |
| From sequence                  | 79.6    | 40    |
| OLIGOMER                       |         |       |
| Dimer/Monomer (%)              | 70/30   | 40/60 |

---


$$q = 4\pi\sin\theta/\lambda$$

Rg radius of gyration

P(r) pairwise distribution function

Porod volume ( $I(q) \propto q^{-4}$ ) (Putnam *et al.*, 2007)

Vc (Rambo and Tainer, 2013)

OLIGOMER (Konarev *et al.*, 2003)**Table S3. CRY SOL3 analysis of SAXS data for uW NK3 without PEG400**

|                          | Dimer | Monomer |
|--------------------------|-------|---------|
| Total water beads        | 2285  | 1248    |
| Beads-convex surface     | 1961  | 1070    |
| Beads-concave surface    | 61    | 39      |
| Beads- internal cavities | 263   | 138     |
| $\chi^2$                 | 2.6   | 22      |
| Radius of Gyration       | 30    | 21      |

---

 CRY SOL3 (Franke *et al.*, 2017)

**Table S4. Statistics of WNK1SA crystallographic data and refinement (PDB file 6CN9)**

|                                      |                                                                                                                             |
|--------------------------------------|-----------------------------------------------------------------------------------------------------------------------------|
| Space group                          | P1                                                                                                                          |
| Unit cell dimensions (Å)             | $a=38.30\text{Å}$ , $b=57.8\text{Å}$ , $c=65.7\text{Å}$<br>$\alpha=91.3^\circ$ , $\beta=89.99^\circ$ , $\gamma=90.89^\circ$ |
| Wavelength (Å)                       | 0.97905                                                                                                                     |
| Resolution (Å)                       | 50-1.8                                                                                                                      |
| No. of unique reflections (last)     | 50,614 (5012)                                                                                                               |
| Average multiplicity (last shell)    | 4.3 (4.3)                                                                                                                   |
| Completeness (%) (last shell)        | 97.6 (96.9)                                                                                                                 |
| Intensity $I/\sigma I$ (%)           | 27.9 / 10.7                                                                                                                 |
| Rsym (last shell) <sup>a</sup>       | 0.077 (0.144)                                                                                                               |
| <hr/>                                |                                                                                                                             |
| Rwork / Rfree <sup>b</sup>           | 0.16 / 0.22                                                                                                                 |
| Non-H protein atoms                  | 5317                                                                                                                        |
| Waters                               | 905                                                                                                                         |
| RMSD in bond length (Å) <sup>c</sup> | 0.03                                                                                                                        |
| RMSD in bond angles (°) <sup>c</sup> | 1.24                                                                                                                        |
| Average B-values (Å <sup>2</sup> )   | 26.9                                                                                                                        |
| <hr/>                                |                                                                                                                             |
| Ramachandran plot statistics (%)     |                                                                                                                             |
| Most favored                         | 96.1                                                                                                                        |
| Additionally allowed                 | 2.6                                                                                                                         |
| Disallowed                           | 1.3                                                                                                                         |

---

<sup>a</sup>  $R_{\text{sym}} = \sum |I_{\text{avg}} - I_j| / \sum I_j$ .

<sup>b</sup>  $R_{\text{factor}} = \sum |F_o - F_c| / \sum F_o$ , where  $F_o$  and  $F_c$  are observed and calculated structure factors, respectively,  $R_{\text{free}}$  was calculated from a randomly chosen 5% of reflections excluded from the refinement, and  $R_{\text{factor}}$  was calculated from the remaining 95% of reflections.

<sup>c</sup> r.m.s.d is the root-mean-square deviation from ideal geometry.

## References

- Franke, D., Petoukhov, M.V., Konarev, P.V., Panjkovich, A., Tuukkanen, A., Mertens, H.D.T., Kikhney, A.G., Hajizadeh, N.R., Franklin, J.M., Jeffries, C.M., and Svergun, D.I. (2017). ATSAS 2.8: a comprehensive data analysis suite for small-angle scattering from macromolecular solutions. *J Appl Crystallogr* *50*, 1212-1225.
- Konarev, P.V., Volkov, V.V., Sokolova, A.V., Koch, M.H., and Svergun, D.I. (2003). PRIMUS: a Windows PC-based system for small-angle scattering analysis. *J. Appl. Crystallogr.* *36*, 1277-1282.
- Putnam, C.D., Hammel, M., Hura, G.L., and Tainer, J.A. (2007). X-ray solution scattering (SAXS) combined with crystallography and computation: defining accurate macromolecular structures, conformations and assemblies in solution. *Q Rev Biophys* *40*, 191-285.
- Rambo, R.P., and Tainer, J.A. (2013). Accurate assessment of mass, models and resolution by small-angle scattering. *Nature* *496*, 477-481.
